# Supplementary material for: CoSpliceNet: a framework for co-splicing network inference from transcriptomics data
Source: PubMed Central journal article supplement (PMC5086072; doi:10.1186/s12864-016-3172-6), 2016-10-28
Supplement: 12864_2016_3172_MOESM1_ESM.pdf [file 12864_2016_3172_MOESM1_ESM.pdf]

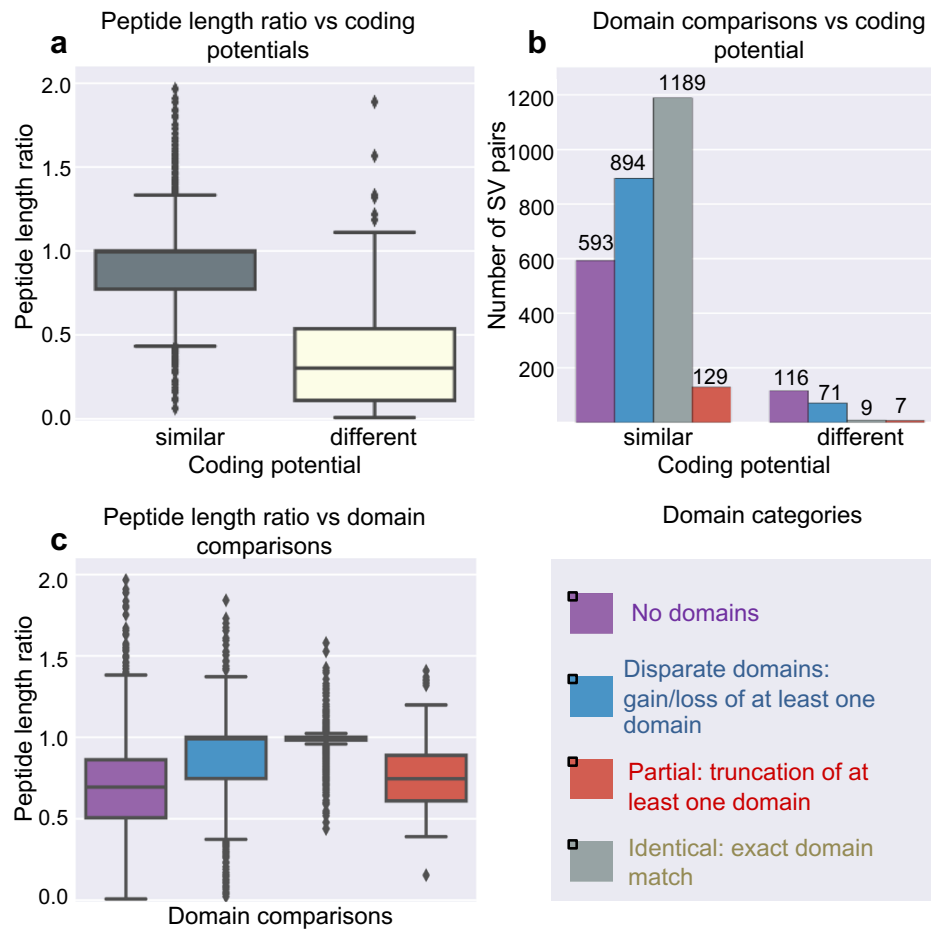

**Additional File 1: Figure S1.** Protein diversity analysis on the set of differentially expressed transcripts during Arabidopsis embryo development. 2,345 genes were alternatively spliced. Protein diversity analysis was performed on 3,008 SV-pairs of these genes. a Effect of coding potential on peptide length differences of protein isoforms. b Relationship between the domain composition and coding potential. c Relationship between the peptide length ratio and coding potential.
