# Supplementary material for: CoSpliceNet: a framework for co-splicing network inference from transcriptomics data
Source: PubMed Central journal article supplement (PMC5086072; doi:10.1186/s12864-016-3172-6), 2016-10-28
Supplement: 12864_2016_3172_MOESM19_ESM.pdf [file 12864_2016_3172_MOESM19_ESM.pdf]

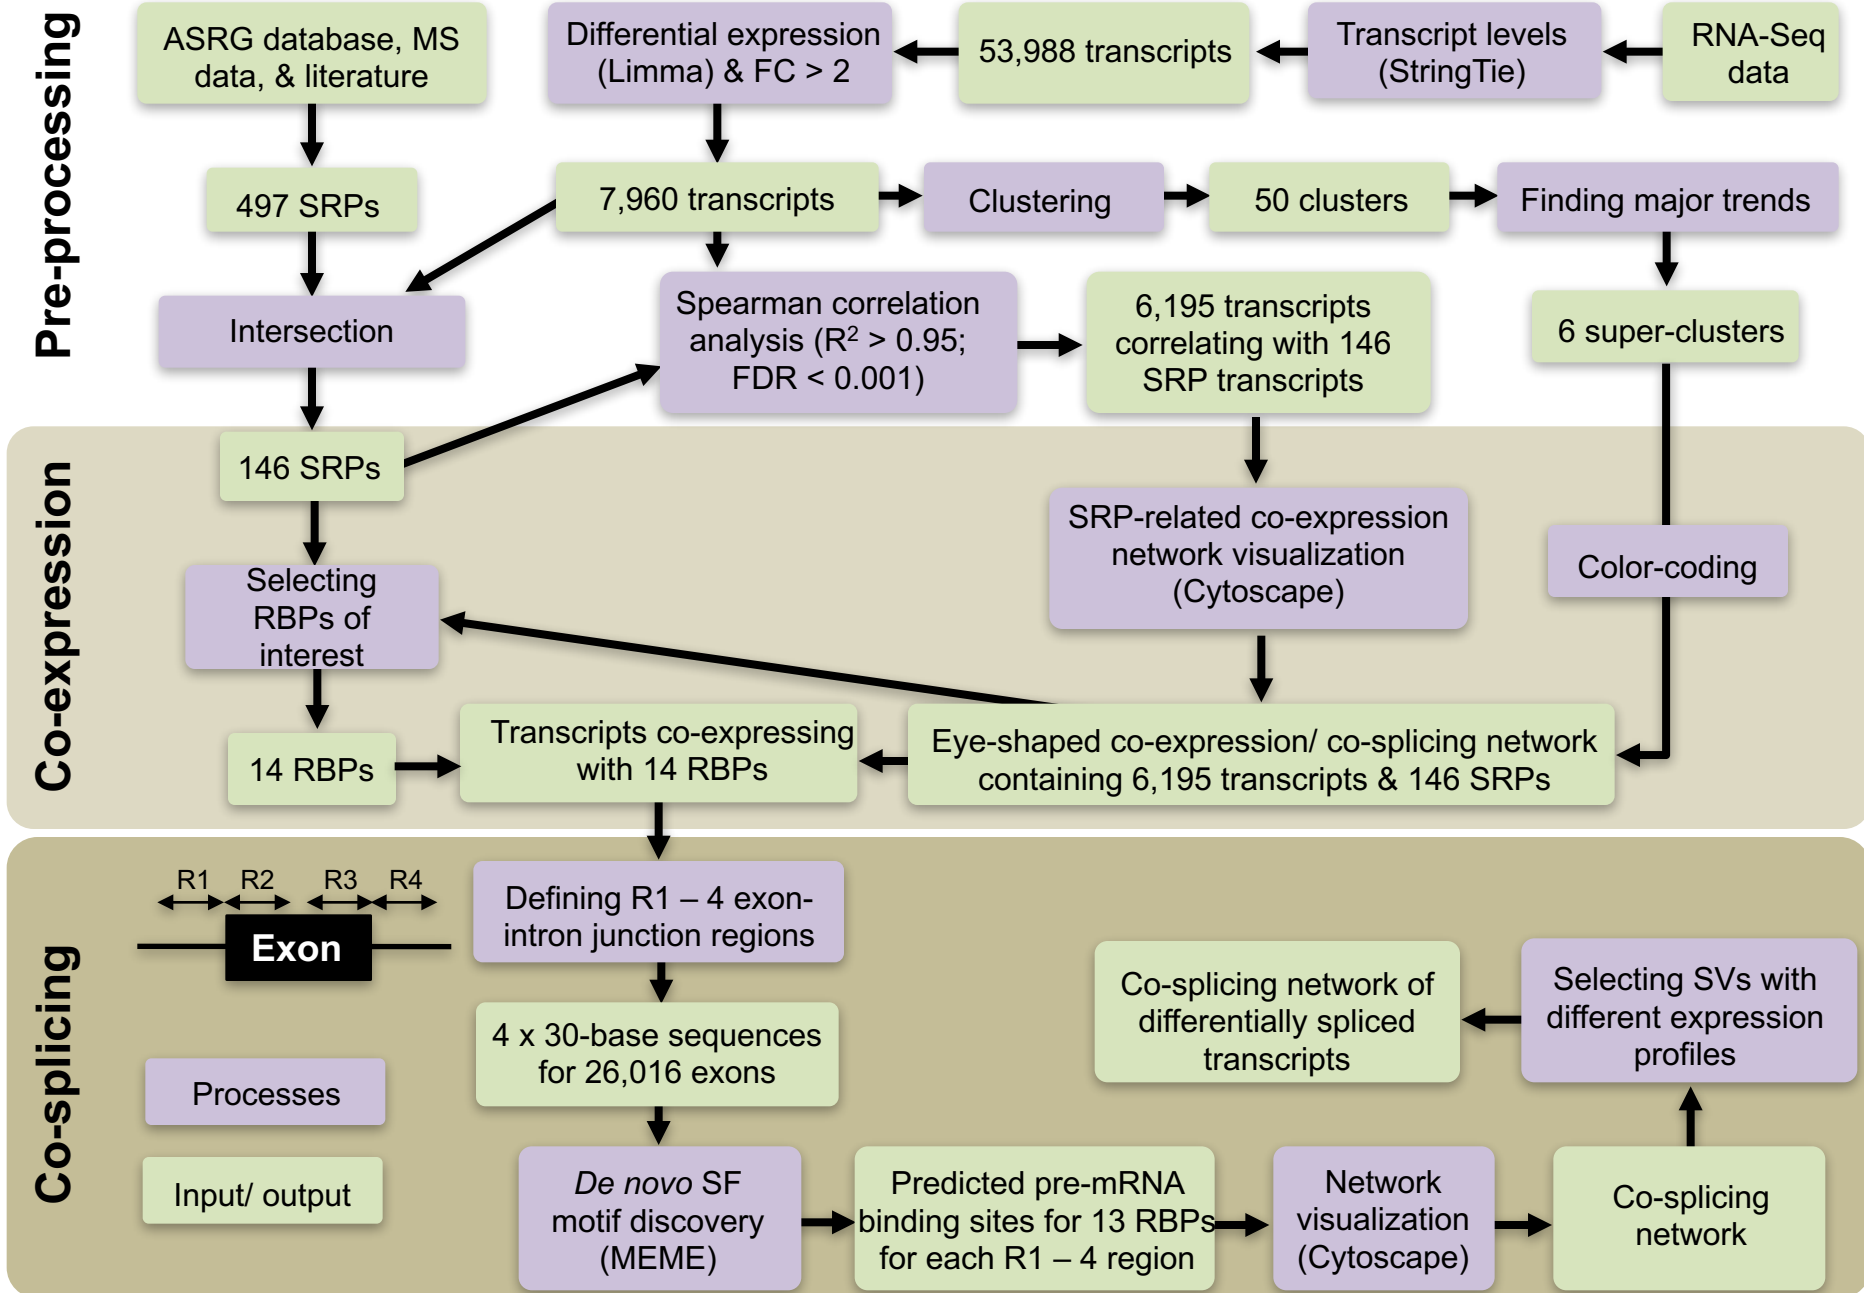

**Additional File 19: Figure S4.** Step-by-step bioinformatics pipeline for co-splicing network construction from expression data
